# Supplementary material
Source: PubMed Central journal article supplement (PMC2775828)
Supplement: mmc1.pdf [file mmc1.pdf]

## Supplemental Data

### Identification of *CANT1* Mutations

#### in Desbuquois Dysplasia

Céline Huber, Bénédicte Oulès, Marta Bertoli, Mounia Chami, Mélanie Fradin, Yasemin Alanay, Lihadh I. Al-Gazali, Margreet G.E.M. Ausems, Pierre Bitoun, Denise P Cavalcanti, Martine Le Merrer, Geert Mortier, Yousef Shafeghati, Andrea Superti-Furga, Stephen P. Robertson, Carine Le Goff, Andrea Onettimuda, Patrizia Paterlini-Bréchet, Arnold Munnich, and Valérie Cormier-Daire

**Table S1. Sequences of *CANT1* primers**

| Primer Name    | Sequence (5'-3')          |
|----------------|---------------------------|
| CANT1-Ex1-F    | AAAAACACAAACCACAGCTC      |
| CANT1-Ex1-R    | GAGTCAGGGGGCAGAGAT        |
| CANT1-Ex2(1)-F | TGTCTATGATCCTATCCCACTTCAC |
| CANT1-Ex2(1)-R | GAGTGCATAGACTCATTCCATTCC  |
| CANT1-Ex2(2)-F | GAACTAAGATGTGACTGGGCTTG   |
| CANT1-Ex2(2)-R | AATCAGGTCCGATAGCTCCAT     |
| CANT1-Ex2(3)-F | AGAGGAAAACACCTGGTTCAGTTA  |
| CANT1-Ex2(3)-R | ATAAGCTCTTCCTCCTAGAACTGC  |
| CANT1-Ex3-F    | AGTCAGGTGCGGGGTCTAAG      |
| CANT1-Ex3-R    | GGCTGTGGAAGCCACACT        |
| CANT1-Ex4(1)-F | AGCCCCTTGCCTGCTACT        |
| CANT1-Ex4(1)-R | AGCATGGAAAGCAGTTCAGAC     |
| CANT1-Ex4(2)-F | GGTTGGAGGTCTGGACAGG       |
| CANT1-Ex4(2)-R | GTGATAAGATTTGGTGATTCCACTT |
| CANT1-Ex4(3)-F | GGCTGTGCAGTACTTTGAAGTTTTA |
| CANT1-Ex4(3)-R | GCACAGGGACAGCCAGAG        |
| CANT1-Ex4(4)-F | CTCCCCACAGCACTACCTCAC     |
| CANT1-Ex4(4)-R | CTCTGCAAACAGTCAGCACAGA    |
